# Supplementary material for: Ternary selenides A2Sb4Se8 (A = K, Rb and Cs) as an n-type thermoelectric material with high power factor and low lattice thermal conductivity: importance of the conformationally flexible Sb–Se–Se–Sb bridges
Source: Royal Society of Chemistry journal article supplement (doi:10.1039/d0ra01751e), 2020-01-01
Supplement: d0ra01751e1.pdf [file d0ra01751e1.pdf]

Supporting Information

for

**Ternary selenides  $A_2Sb_4Se_8$  ( $A = K, Rb, Cs$ ) as an n-type thermoelectric material with high power factor and low lattice thermal conductivity: Importance of the conformationally flexible Sb-Se-Se-Sb bridges**

Changhoon Lee<sup>1</sup>, Sujee Kim<sup>1</sup>, Won-Joon Son<sup>2</sup>, Ji-Hoon Shim<sup>1\*</sup>, Myung-Hwan Whangbo<sup>3-5\*</sup>

<sup>1</sup> Department of Chemistry, Pohang University of Science and Technology, Pohang, 37673, Korea

<sup>2</sup> Samsung Advanced Institute of Technology (SAIT), Samsung Electronics, 130 Samsung-ro, Yeongtong-gu, Suwon 16678, Korea

<sup>3</sup> Department of Chemistry, North Carolina State University, Raleigh, NC, 27695-8204, USA.

<sup>4</sup> State Key Laboratory of Structural Chemistry, Fujian Institute of Research on the Structure of Matter (FJIRSM), Chinese Academy of Sciences (CAS), Fuzhou, China, 350002

<sup>5</sup> State Key Laboratory of Crystal Materials, Shandong University, Jinan, China, 250100

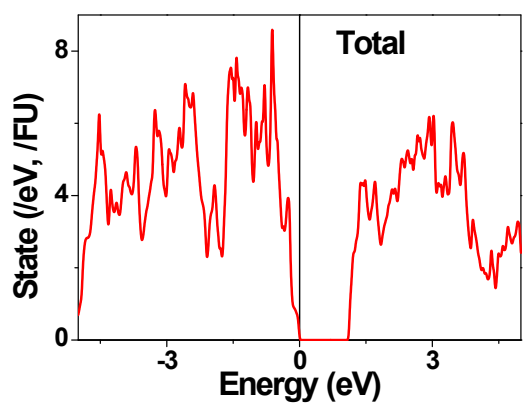

(a)

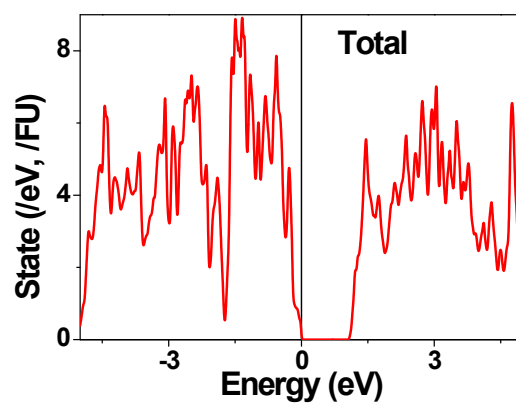

(b)

Figure S1. Total DOS plots calculated for (a)  $\text{Rb}_2\text{Sb}_4\text{Se}_8$  and (b)  $\text{Cs}_2\text{Sb}_4\text{Se}_8$ .

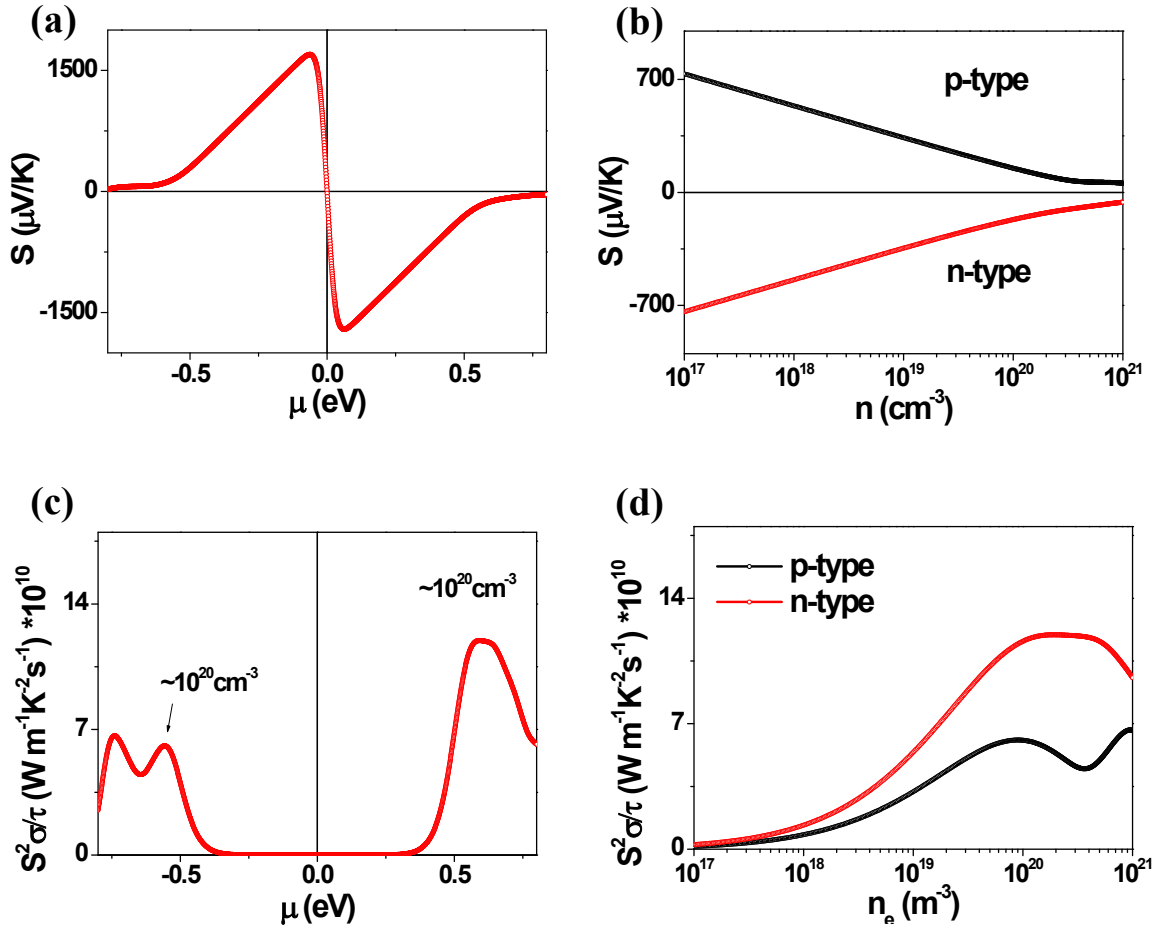

Figure S2. Thermodynamic properties of  $\text{Rb}_2\text{Sb}_4\text{Se}_8$  calculated at 300 K: (a) Seebeck coefficient  $S$  as function of the chemical potential  $\mu$ . (b) Seebeck coefficient  $S$  as function of the carrier density  $n$ . (c) Power factor  $S^2\sigma/\tau$  as function of the chemical potential  $\mu$ . (d) Power factor  $S^2\sigma/\tau$  as function of the carrier density  $n$ .

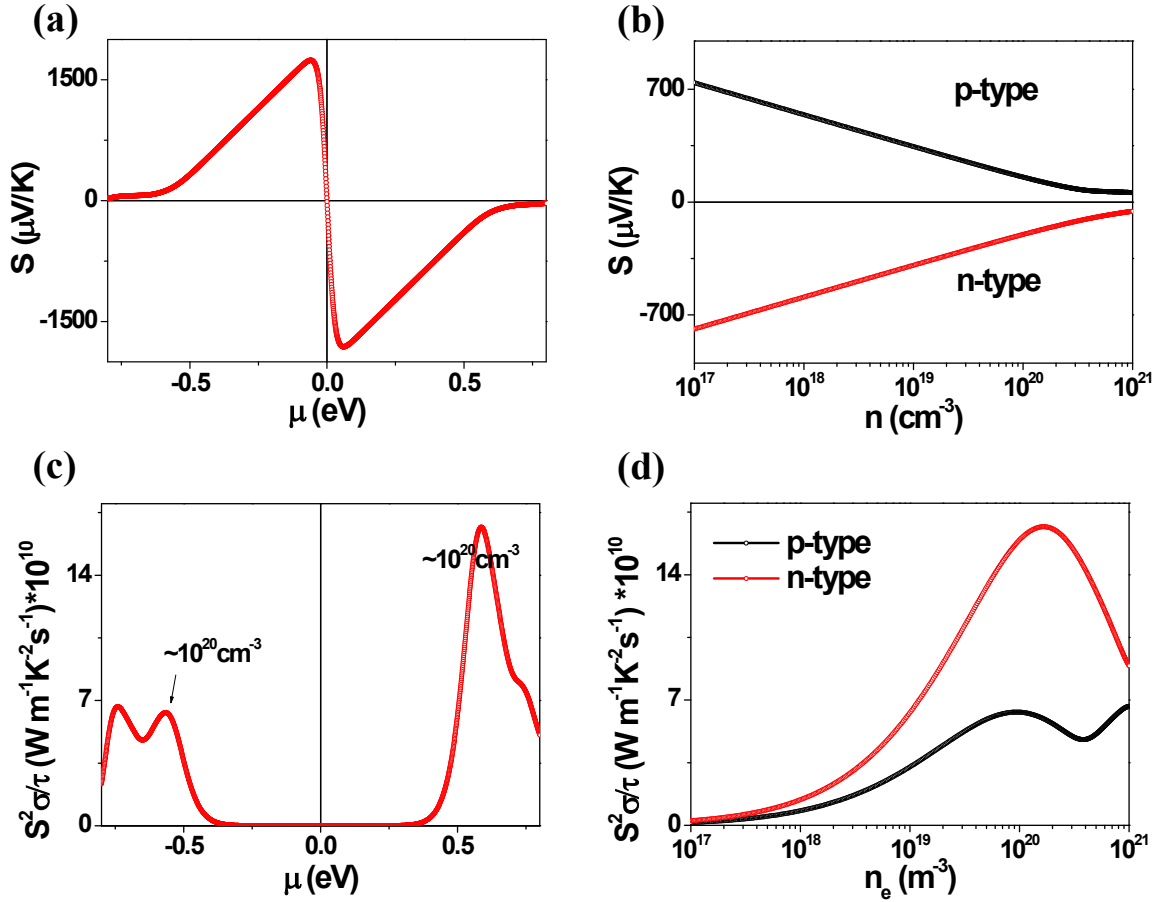

Figure S3. Thermodynamic properties of  $\text{Cs}_2\text{Sb}_4\text{Se}_8$  calculated at 300 K: (a) Seebeck coefficient  $S$  as function of the chemical potential  $\mu$ . (b) Seebeck coefficient  $S$  as function of the carrier density  $n$ . (c) Power factor  $S^2\sigma/\tau$  as function of the chemical potential  $\mu$ . (d) Power factor  $S^2\sigma/\tau$  as function of the carrier density  $n$ .

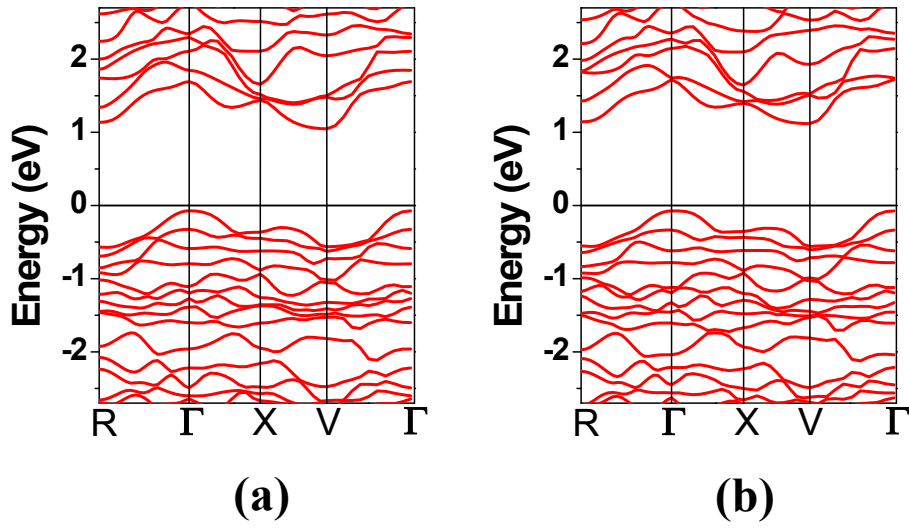

Figure S4. Band dispersion relations calculated for (a)  $\text{Rb}_2\text{Sb}_4\text{Se}_8$  and (b)  $\text{Cs}_2\text{Sb}_4\text{Se}_8$ .

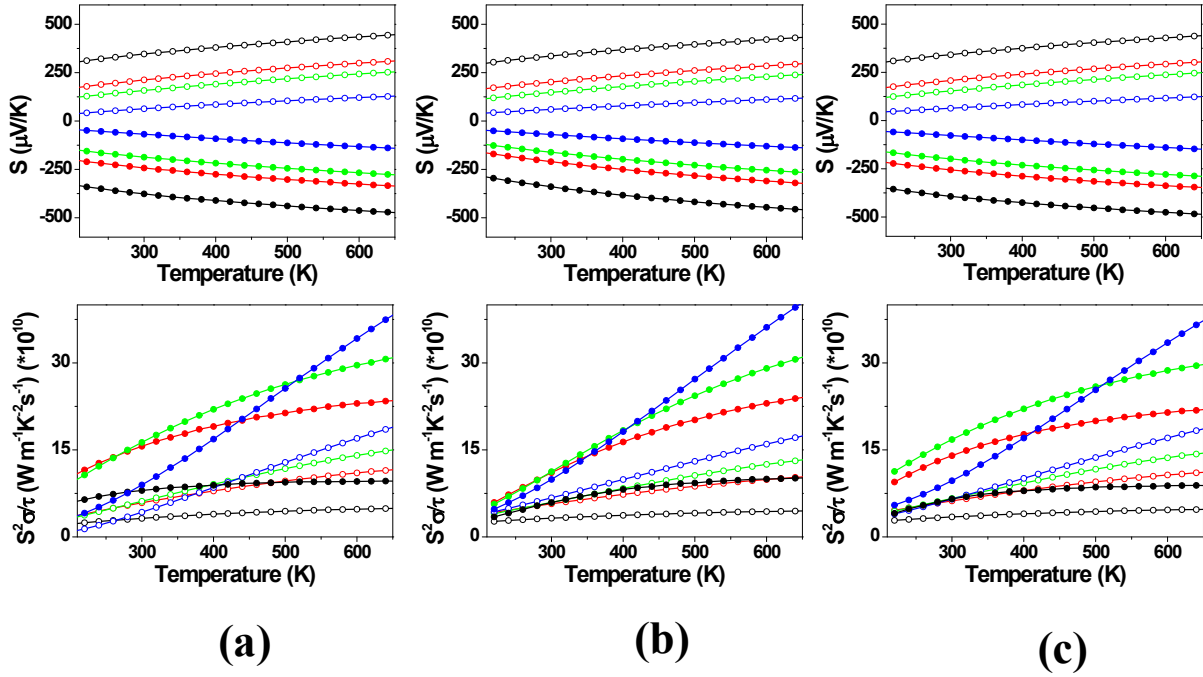

Figure S5. The temperature dependence of the Seebeck coefficients  $S$  (upper panels) and the power factor  $S^2\sigma/\tau$  (down panels) plots calculated for (a)  $\text{K}_2\text{Sb}_4\text{Se}_8$ , (b)  $\text{Rb}_2\text{Sb}_4\text{Se}_8$ , and (c)  $\text{Cs}_2\text{Sb}_4\text{Se}_8$ . The black, red, green, and blue circles refer to carrier concentration  $1 \times 10^{19}$ ,  $5 \times 10^{19}$ ,  $1 \times 10^{20}$ , and  $5 \times 10^{20} \text{ cm}^{-3}$ , respectively. The open and filled circles indicate hole- and electron-type carriers.
